# Supplementary material for: Exploring Viral Genome Profile in Mpox Patients during the 2022 Outbreak, in a North-Eastern Centre of Italy
Source: MDPI journal article supplement (doi:10.3390/v16050726), 2024-05-03
Supplement: s1 [file s1]

## Supplementary Material

**Table S1: identified mutations.** Available at the following [link](#)

**Table S2.** Characteristics of participants included in the study. Demographic information, collection time, qPCR Ct value, travel history, comorbidities, risk behaviors and the number of days until patients tested negative at qPCR.

| ID | Sex | Age (years old) | Collection data | qPCR (Ct value) | Travel history          | Immune system diseases | Analysed matrix | sexual risk behaviors | Positivity period (days) |
|----|-----|-----------------|-----------------|-----------------|-------------------------|------------------------|-----------------|-----------------------|--------------------------|
| P1 | M   | 44              | June 2022       | 20.00           | Yes, Palma de Mallorca  | HIV                    | Lesion swab     | Yes                   | 22                       |
| P2 | M   | 46              | July 2022       | 18.90           | Yes, Spain              | HIV                    | Lesion swab     | Yes                   | 23                       |
| P3 | M   | 43              | October 2022    | 12.79           | No                      | none                   | Lesion swab     | Yes                   | 21                       |
| P4 | M   | 45              | November 2022   | 16.02           | Yes, Bosnia-Herzegovina | none                   | Lesion swab     | Not available         | 34                       |

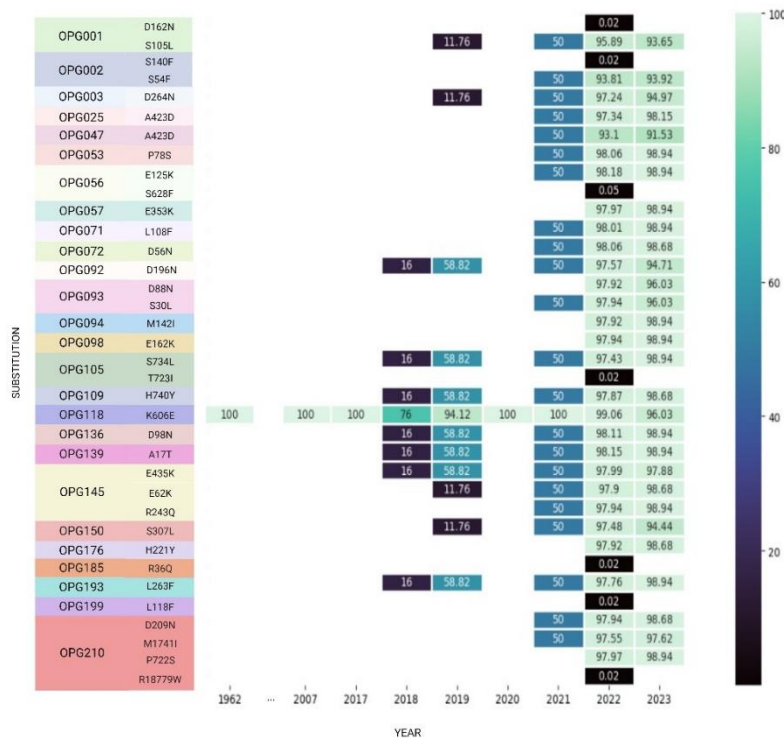

**Figure S1.** Heatmap showing estimated frequencies of the 36 mutations (known and novel) identified in the viral genome from samples of the four patients analysed in the present study. Each column represents a year. Variants are ordered by year of detection. Each row represents a single variant. Colours depict the mutation frequency in the database: the clearer colour indicating the higher mutation frequency. The heatmap was generated using the function heatmap from the Python data visualization library seaborn (<https://seaborn.pydata.org/generated/seaborn.heatmap.html>, last accessed 5 July 2023).

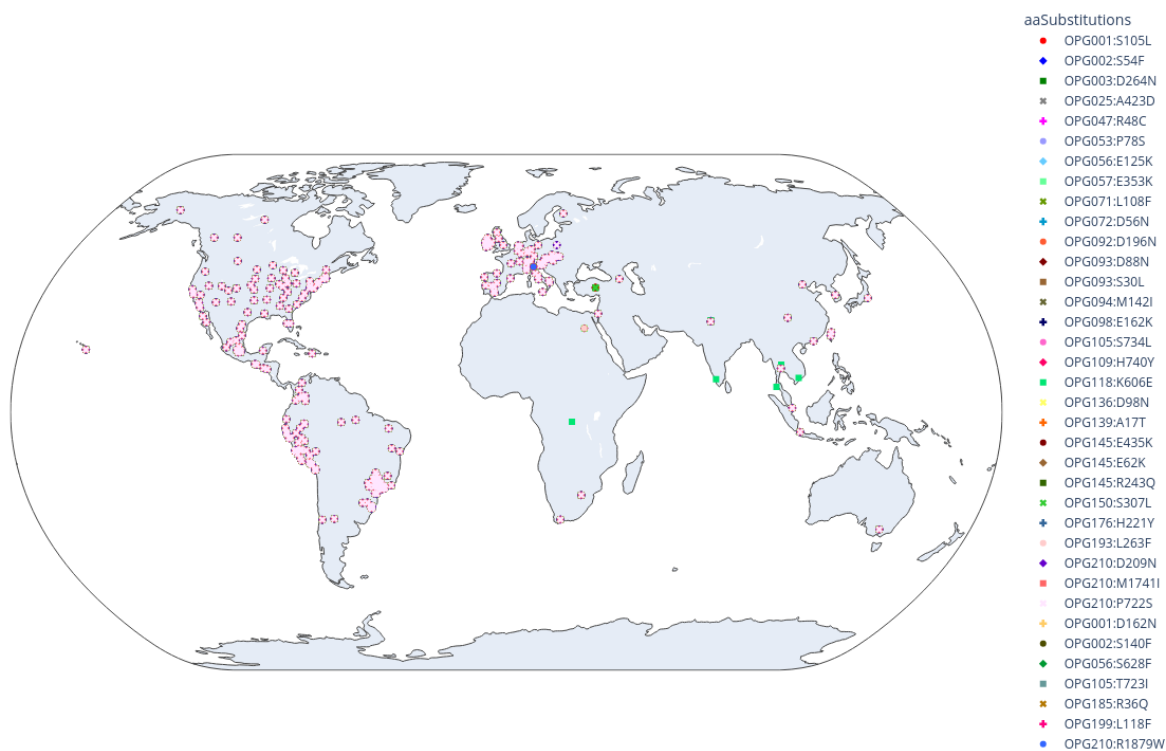

**Figure S2. Geographic spread of the 37 SNVs.**

### **Section S1. Primers design and sequences.**

Primers were designed using OligoPerfect Primer Designer (ThermoFisher).

| Gene name     | SNV location | Amplicon size | Primer Name | Primer sequence             |
|---------------|--------------|---------------|-------------|-----------------------------|
| <b>OPG210</b> | 186990       | 256 bp        | OPG210_fw   | TGGCAATTTATATAGCGCGCA       |
|               |              |               | OPG210_rv   | CGGTAGTTACATATTACCATATCATCC |
| <b>OPG199</b> | 171841       | 232 bp        | OPG199_fw   | GGCGATATTCTGCCGTGTTT        |
|               |              |               | OPG_199_rv  | GGTTGATGCCATTCGAAAAGGA      |
| <b>OPG185</b> | 159023       | 202 bp        | OPG185_fw   | TGACACAATTACCAATACTTTTGTAC  |
|               |              |               | OPG_185_rv  | AAAAGCGACGTCTTGTATTTTGA     |

## Section S2. PCR conditions

| Component                      | Volume  |
|--------------------------------|---------|
| Q5 High-Fidelity 2X Master Mix | 12.5µl  |
| 10 µM Forward Primer           | 1.25µl  |
| 10 µM Reverse Primer           | 1.25 µl |
| Nuclease-Free Water            | 5 µl    |
| DNA                            | 5 µl    |
| TOTAL VOLUM                    | 25 µl   |

| STEP                 | TEMPERATURE | TIME       |
|----------------------|-------------|------------|
| Initial Denaturation | 98°C        | 30 seconds |
| 35 Cycles            | 98°C        | 8 seconds  |
|                      | OPG210 59°C | 30 seconds |
|                      | OPG199 61°C | 30 seconds |
|                      | OPG185 58°C |            |
|                      | 72°C        | 30 seconds |
| Final Extension      | 72°C        | 2 minutes  |
| Hold                 | 4°C         | ∞          |

## Section S3. NGS results

**Table S3** QC results of sequenced data. For each sample, the columns show the GISAID EPID (if available), the total number of sequenced fragments, the percentage of GC content, the number of mapped fragments on MPXV reference, the mean depth of coverage and the percentage of target sequences covered at least by 1/10/30 reads.

| ID | EPID             | Total n° of sequenced fragments | GC (%) | N° of fragments mapped on MPXV | Mean depth coverage (X) | 1X (%) | 10X (%) | 30 X (%) |
|----|------------------|---------------------------------|--------|--------------------------------|-------------------------|--------|---------|----------|
| P1 | EPI_ISL_14786290 | 23,846,609                      | 42     | 28,971                         | 35.70                   | 100    | 99.27   | 69.89    |
| P2 | EPI_ISL_14786346 | 17,467,127                      | 41     | 57,273                         | 71.59                   | 100    | 99.93   | 99.72    |
| P4 | EPI_ISL_16467111 | 16,492,867                      | 40     | 94,306                         | 91.09                   | 99.99  | 99.85   | 99.56    |
| P3 | -                | 2,572,696                       | 39     | 19,017                         | 13.68                   | 99.90  | 79.98   | 12.11    |

**Table S4.** Results of assembled sequences. For each sample the columns show the GISAID EPID (if available), the total length of the genome assembled with iVar, the total number of unidentified nucleotides (Ns) present in the assembled genomes, and the number of gaps, identified SNVs, Indels, frameshifts, amino acid substitutions, deletions and insertions.

| ID | EPID             | Assembly length | Coverage (%) | # Ns   | Gaps | # SNVs | # dels. | # ins. | # frameshift | # AA subs. | # AA dels | # AA ins. |
|----|------------------|-----------------|--------------|--------|------|--------|---------|--------|--------------|------------|-----------|-----------|
| P1 | EPI_ISL_14786290 | 197,120         | 99.92%       | 1,501  | 34   | 68     | 116     | 15     | 10           | 30         | 8         | 0         |
| P2 | EPI_ISL_14786346 | 197,082         | 99.83%       | 164    | 7    | 73     | 151     | 18     | 14           | 27         | 15        | 0         |
| P4 | EPI_ISL_16467111 | 197,197         | 99.24%       | 343    | 13   | 74     | 13      | 1      | 0            | 33         | 0         | 0         |
| P3 | -                | 197,210         | 80.04%       | 39,353 | 2    | 61     | 2       | 27     | 16           | 26         | 1         | 1         |

Section S4. IGV inspection of identified novel mutations

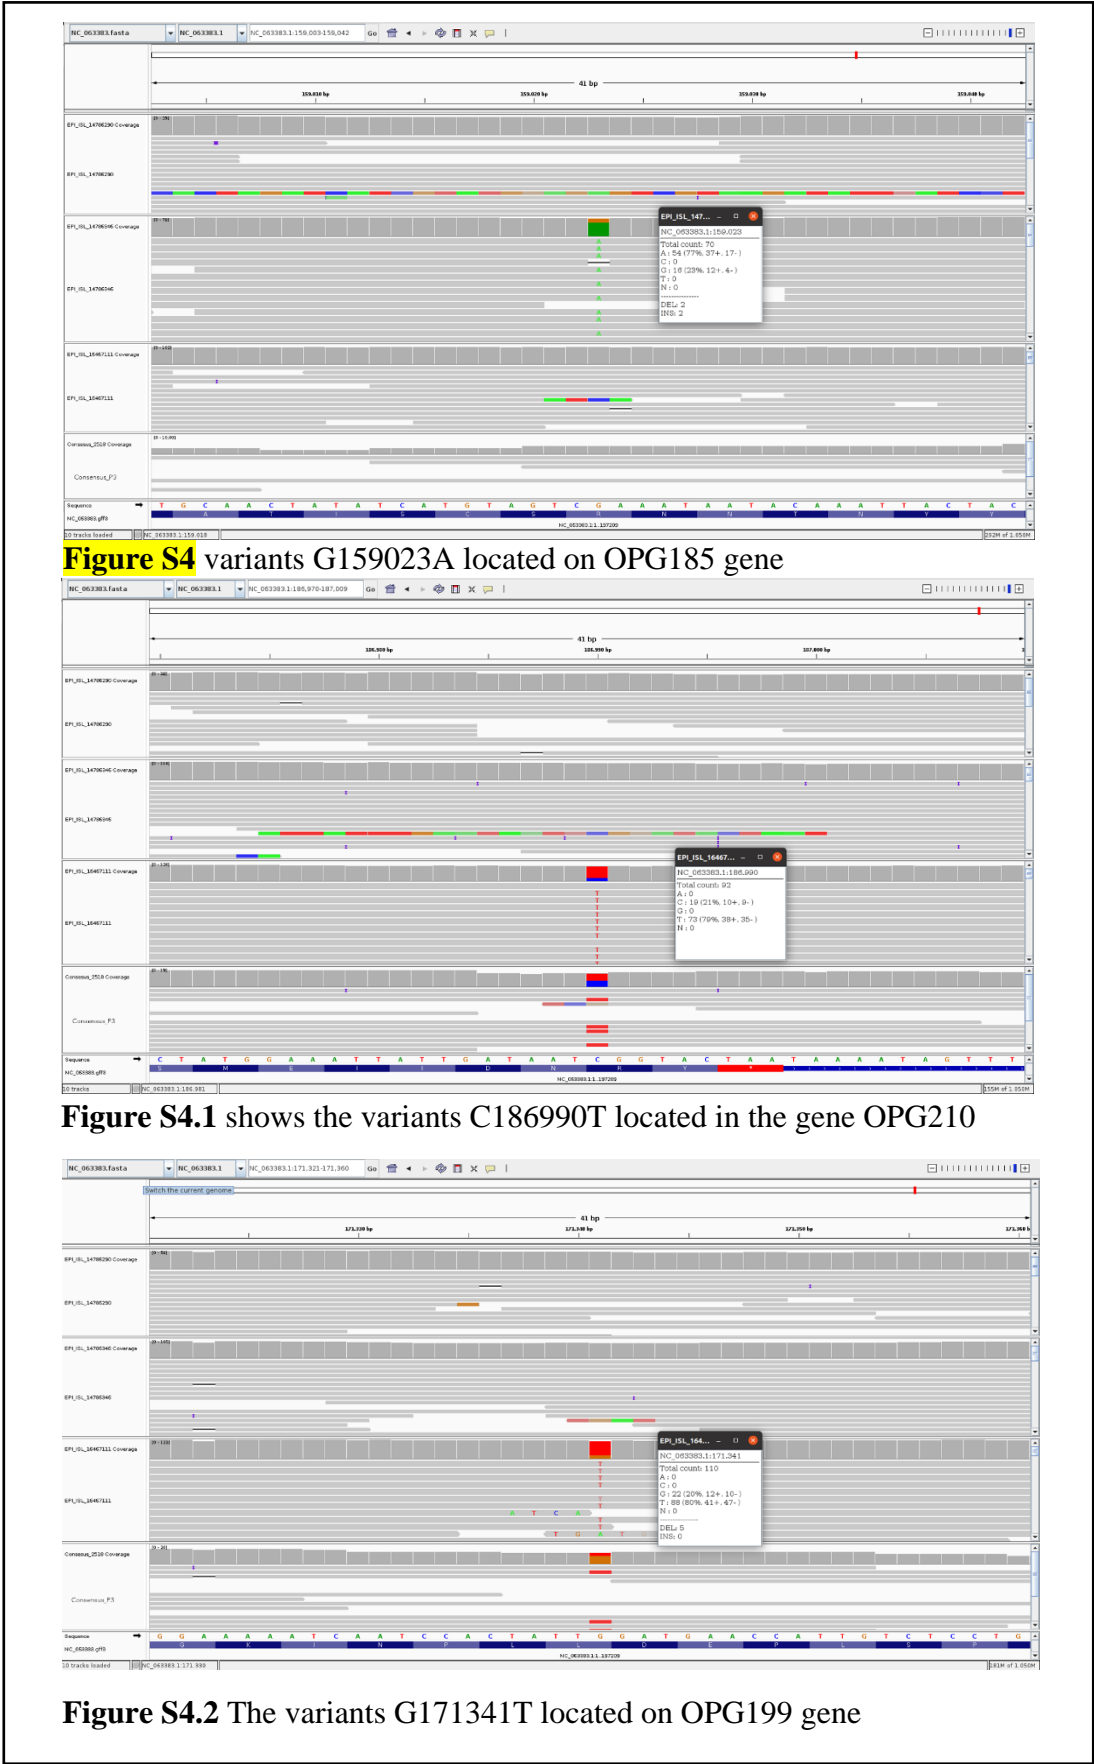

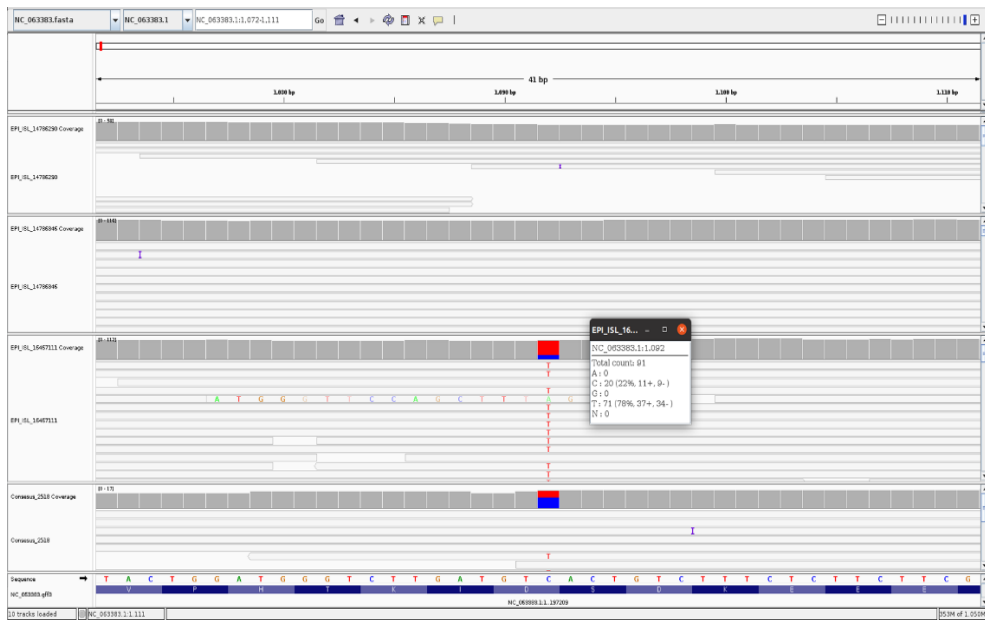

**Figure S4.3** The variants C1092T located on OPG001 gene, called by white reads

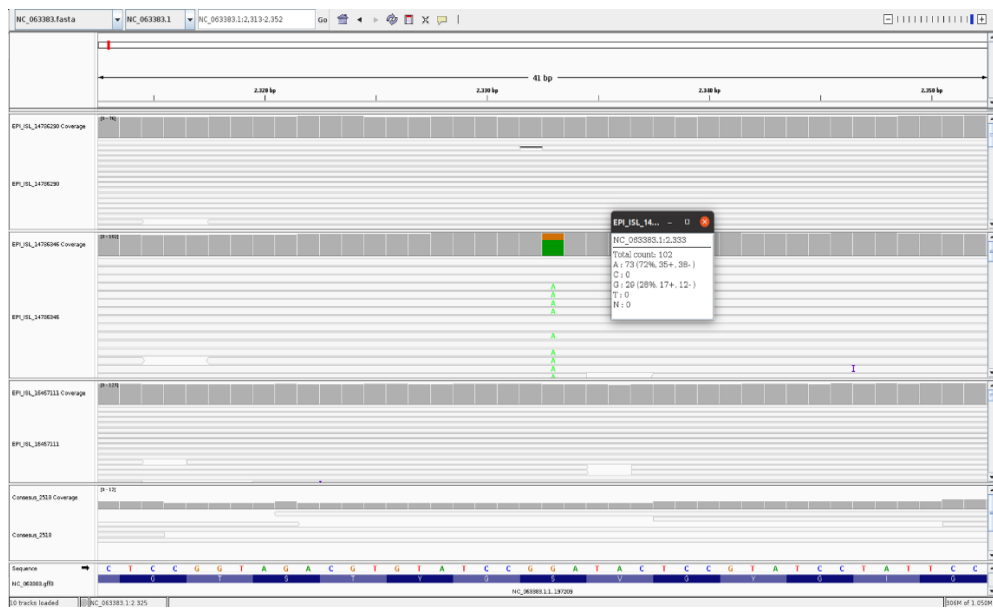

**Figure S4.4** The variants G2333A located on OPG002 gene, called by white reads

Table S5: APOBEC3 derived mutations, available at the following [link](#)

### Section S5. Sanger Sequencing analysis

Sample P2- mutation OPG185: R36Q - G159023A

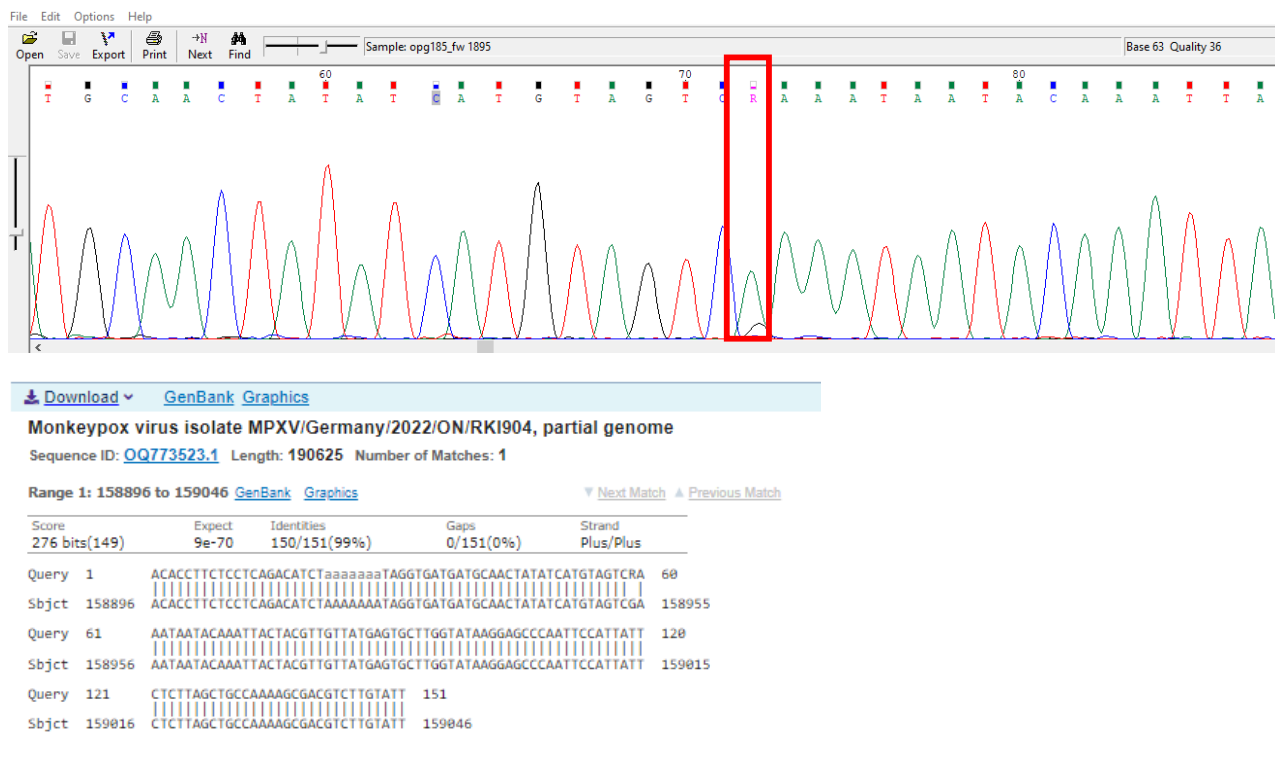

Fare clic o toccare qui per immettere il testo.

Sample P3- mutation OPG210:R1879Q – C186990T

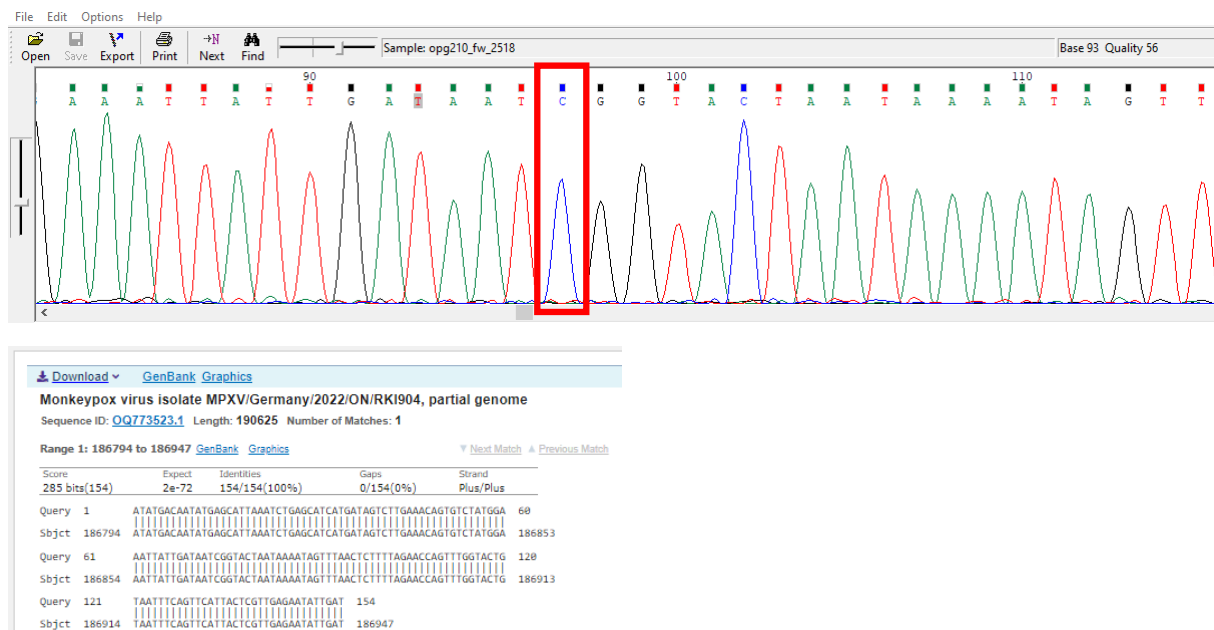

File Edit Options Help

Open Save Export Print →N Next Find [Slider] Sample: opg199\_fw\_2518 [Base 105 Quality 54]

90 100 110 120

G A G G G A A A A A T C A A T C C A T T G A T G A A C C A T T G

<

Monkeypox virus isolate MPXV/Germany/2022/ON/RKI904, partial genome

Sequence ID: [OQ773523.1](#) Length: 190625 Number of Matches: 1

Range 1: 171186 to 171305 [GenBank](#) [Graphics](#)

▼ Next Match ▲ Previous Match

| Score         | Expect                                                      | Identities    | Gaps      | Strand    |
|---------------|-------------------------------------------------------------|---------------|-----------|-----------|
| 222 bits(120) | 9e-54                                                       | 120/120(100%) | 0/120(0%) | Plus/Plus |
| Query 1       | ACTGTGACTTCACTGATTGTCGCACATAGATGCAATCAATAAGTGTGATAGATATCTTT | 60            |           |           |
| Sbjct 171186  | ACTGTGACTTCACTGATTGTCGCACATAGATGCAATCAATAAGTGTGATAGATATCTTT | 171245        |           |           |
| Query 61      | ACTGAGGGAAAAATCAATCCACTATTGGATGAACCATTGTCTCTGATACCTGTCTCCTA | 120           |           |           |
| Sbjct 171246  | ACTGAGGGAAAAATCAATCCACTATTGGATGAACCATTGTCTCTGATACCTGTCTCCTA | 171305        |           |           |

The screenshot shows a DNA sequencing chromatogram with a red peak at position 90, which is highlighted with a red box. The chromatogram displays four lanes (A, C, G, T) and a quality score of 58. The peak at position 90 is a red peak, indicating a 'T' base. The peak at position 100 is a blue peak, indicating a 'C' base. The peak at position 110 is a green peak, indicating an 'A' base.

Monkeypox virus isolate MPXV/Germany/2022/ON/RKI904, partial genome

Sequence ID: [OQ773523.1](#) Length: 190625 Number of Matches: 1

Range 1: 186786 to 186934 [GenBank](#) [Graphics](#)

▼ Next Match ▲ Previous Match

| Score         | Expect                                                     | Identities   | Gaps      | Strand    |
|---------------|------------------------------------------------------------|--------------|-----------|-----------|
| 270 bits(146) | 4e-68                                                      | 148/149(99%) | 0/149(0%) | Plus/Plus |
| Query 1       | ATAATGAAATATGACAATATGAGCATTAATCTGAGCATCATGATAGTCTTGAACAGTG | 60           |           |           |
| Sbjct 186786  | ATAATGAAATATGACAATATGAGCATTAATCTGAGCATCATGATAGTCTTGAACAGTG | 186845       |           |           |
| Query 61      | TCTATGGAATATTGATAATTTGGTACTAATAAAATAGTTAACTCTTTAGAACAGGTT  | 120          |           |           |
| Sbjct 186846  | TCTATGGAATATTGATAATCGGTACTAATAAAATAGTTAACTCTTTAGAACAGGTT   | 186905       |           |           |
| Query 121     | TGGTACTGTAATTTTCAGTTTCATTACTCGT                            | 149          |           |           |
| Sbjct 186906  | TGGTACTGTAATTTTCAGTTTCATTACTCGT                            | 186934       |           |           |

Sample P4 mutation OPG199:L118F – G171841T

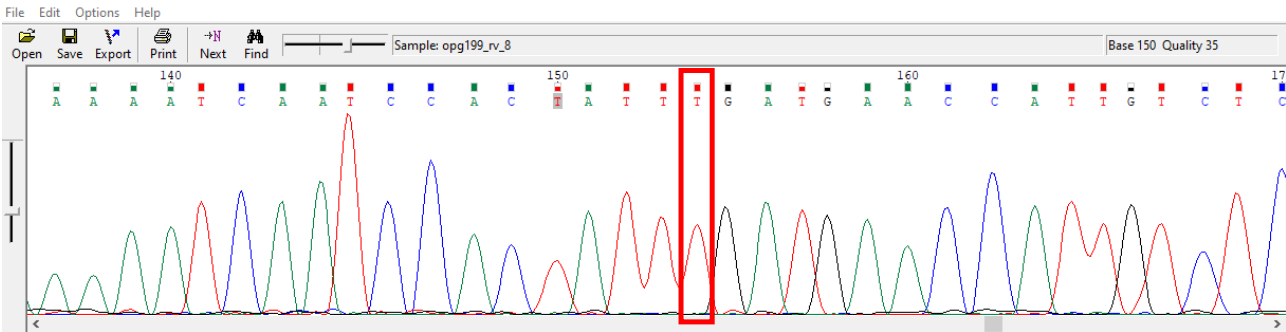

[Download](#) [GenBank](#) [Graphics](#)

**Monkeypox virus isolate MPXV/Germany/2022/ON/RKI904, partial genome**  
Sequence ID: [OQ773523.1](#) Length: 190625 Number of Matches: 1

Range 1: 171135 to 171307 [GenBank](#) [Graphics](#) [Next Match](#) [Previous](#)

| Score         | Expect                                                       | Identities   | Gaps      | Strand    |
|---------------|--------------------------------------------------------------|--------------|-----------|-----------|
| 303 bits(164) | 5e-78                                                        | 169/173(98%) | 0/173(0%) | Plus/Plus |
| Query 1       | TCTGCCGTGTTTAAAGATTCTTTTGGGAAAAATTGGCGATAAGTTTMMACTGTTGAC    | 60           |           |           |
| Sbjct 171135  | TCTGCCGTGTTTAAAGATTCTTTTGGGAAAAATTGGCGATAAGTTTCAAACGTTGAC    | 171194       |           |           |
| Query 61      | TTCACTGATTGTCGCACTATAGATGCAATCAATAAGTGTGTAGATATCTTTACTGAGGGA | 120          |           |           |
| Sbjct 171195  | TTCACTGATTGTCGCACTATAGATGCAATCAATAAGTGTGTAGATATCTTTACTGAGGGA | 171254       |           |           |
| Query 121     | AAAATCAATCCACTATTTGATGAACCATTGTCTCTGATACCTGTCTCCTAGC         | 173          |           |           |
| Sbjct 171255  | AAAATCAATCCACTATTTGATGAACCATTGTCTCTGATACCTGTCTCCTAGC         | 171307       |           |           |
